# Supplementary material for: Structural diversity of four new metal–organic frameworks with a curved tetracarboxdiimide dicarboxylic acid
Source: Royal Society of Chemistry journal article supplement (doi:10.1039/c3ce41805g), 2013-10-25
Supplement: c3ce41805g.pdf [file c3ce41805g.pdf]

## Novel Structural Diversity of Metal-Organic Frameworks based on Tetracarboxydiimide Dicarboxylic Acid

Huimin Li, Jingmin Zhou, Wei Shi,\* Xuejing Zhang, Zhenjie Zhang, Meng Zhang,

Peng Cheng\*

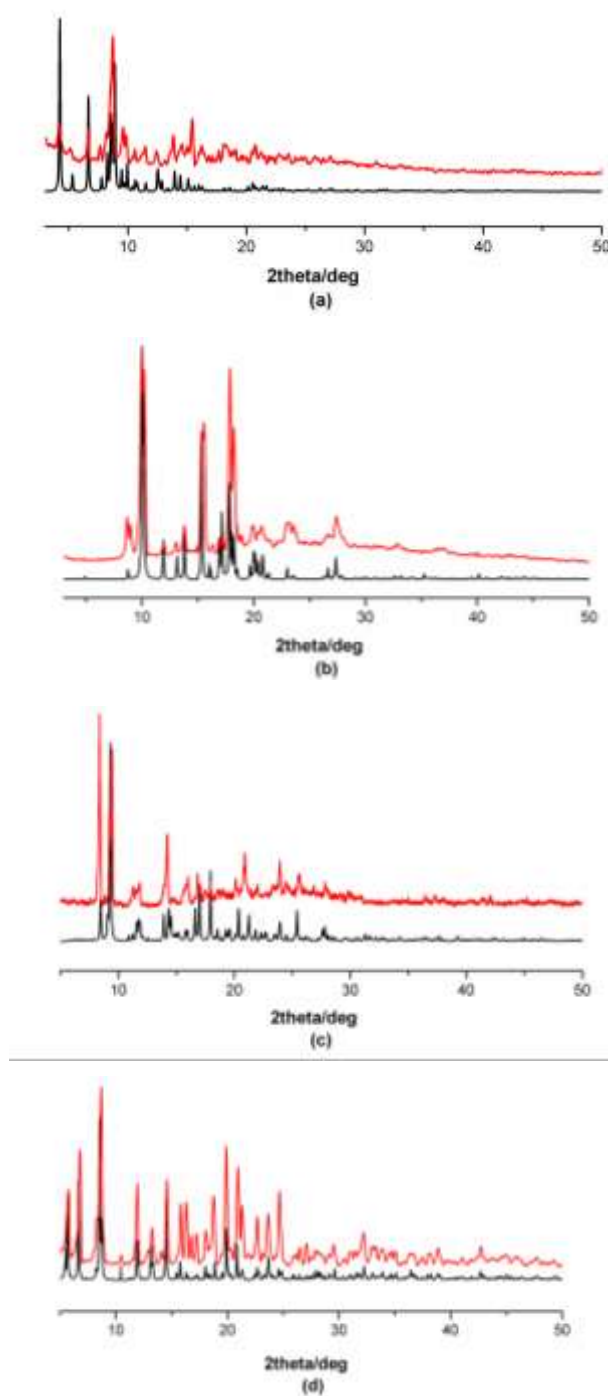

**Figure S1** The X-ray powder diffraction patterns for the simulated (black), as-synthesized samples (red). (a for **1**, b for **2**, c for **3**, d for **4**)

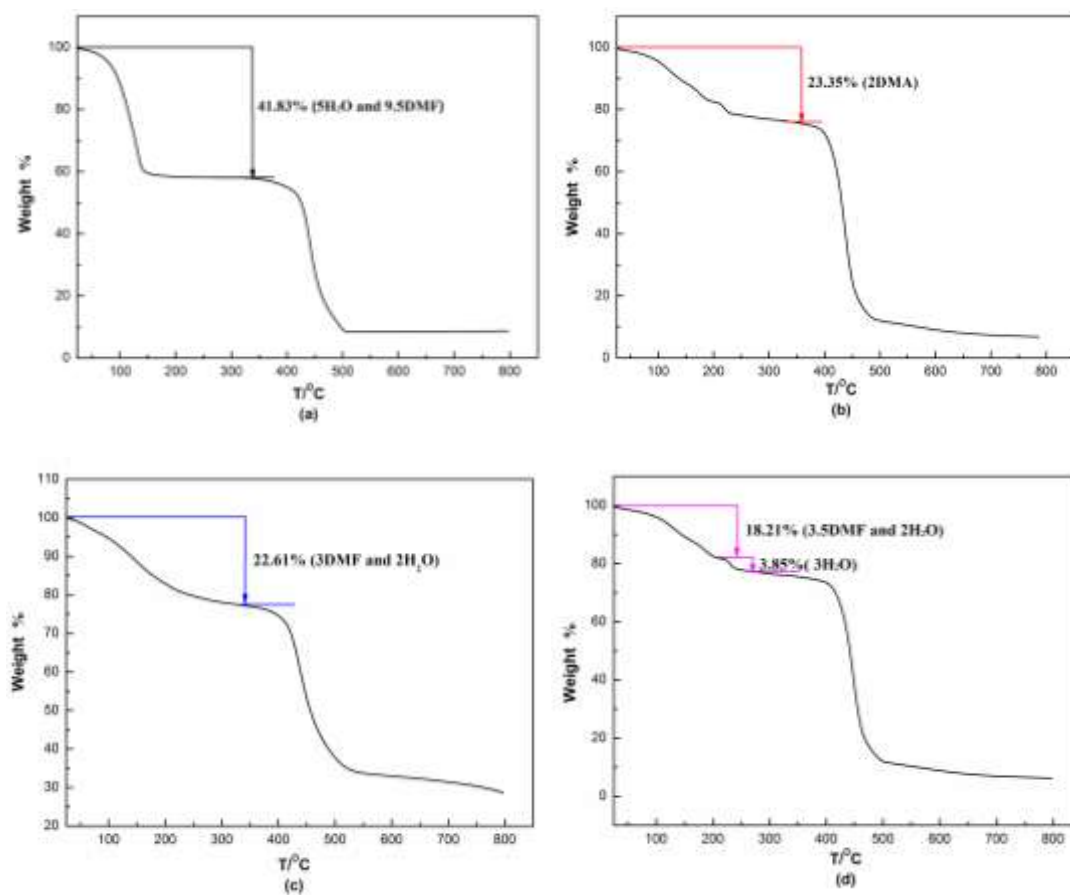

**Figure S2** TGA plots of **1-4**. (a for **1**, b for **2**, c for **3**, d for **4**)
